# Supplementary material
Source: PubMed Central journal article supplement (PMC2722888)

## Online supplemental material

**Fig. S1A and B** Southern (A) and western (B) blot analyses of 2-month-old  $\Delta 7^{+/+}$  SMA carrier mice ( $SMN2^{+/+}; SMN\Delta 7^{+/+}; Smn^{+/-}$ ) that are either partially (N6 FVB/N) or fully (N11 FVB/N) congenic. 1, 3 - males; 2, 4 - females. No difference in transgene copy number or SMN protein levels in the spinal cords was detected between the inbred and hybrid strains. An antibody specific for human SMN was used to detect protein from the *SMN2* and *SMN\Delta 7* transgenes.

**Fig. S2** Western blot analysis of SV2 protein in phrenic nerve branches of a P14  $\Delta 7^{+/+}$  SMA mouse diaphragm indicates that there is no significant increase in the protein compared to that seen in a control littermate.

**Fig. S3** Western blot analysis of NF protein in the cervical (C2-C4) spinal cords of P14  $\Delta 7^{+/+}$  SMA mice indicates no significant increase in protein levels over those in control littermates.

**Fig. S4** Western blot analysis of NF protein in intramuscular nerves of the gastrocnemius muscle of mild SMA mice. An increase in NF protein is detected in older SMA animals suggesting that NF aggregates in milder forms of the disease is a late event.

**Supplemental Figures**

**S1A**

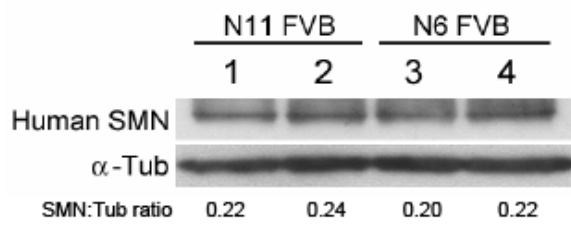

**S1B**

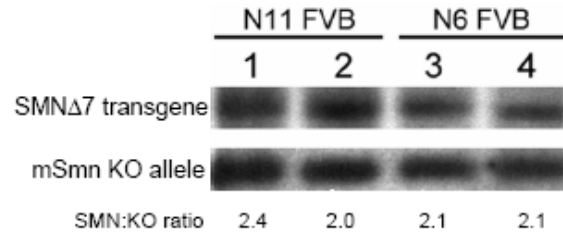

**S2**

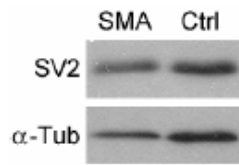

**S3**

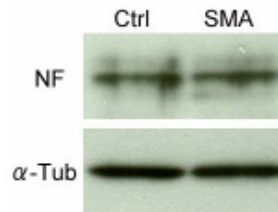

**S4**

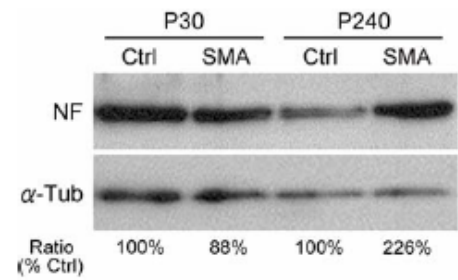

Supplement: ddn156_1.pdf [file ddn156_1.pdf]
